# Supplementary material for: Cellulose-derived superparamagnetic carbonaceous solid acid catalyst for cellulose hydrolysis in an ionic liquid or aqueous reaction system
Source: Royal Society of Chemistry journal article supplement (doi:10.1039/c3gc40433a), 2013-01-01
Supplement: c3gc40433a.pdf [file c3gc40433a.pdf]

# Cellulose-derived superparamagnetic carbonaceous solid acid catalyst for cellulose hydrolysis in ionic liquid or aqueous reaction system

Haixin Guo<sup>a</sup>, Youfen Lian<sup>a</sup>, Lulu Yan<sup>a</sup>, Xinhua Qi<sup>a,\*</sup>, Richard Lee Smith, Jr<sup>b</sup>

<sup>a</sup>Key Laboratory of Pollution Processes and Environmental Criteria (Ministry of Education), College of Environmental Science and Engineering, Nankai University, Tianjin 300071, China

<sup>b</sup>Research Center of Supercritical Fluid Technology, Tohoku University, 6-6-11 Aoba, Aramaki, Aoba-ku, Sendai 980-8579, Japan

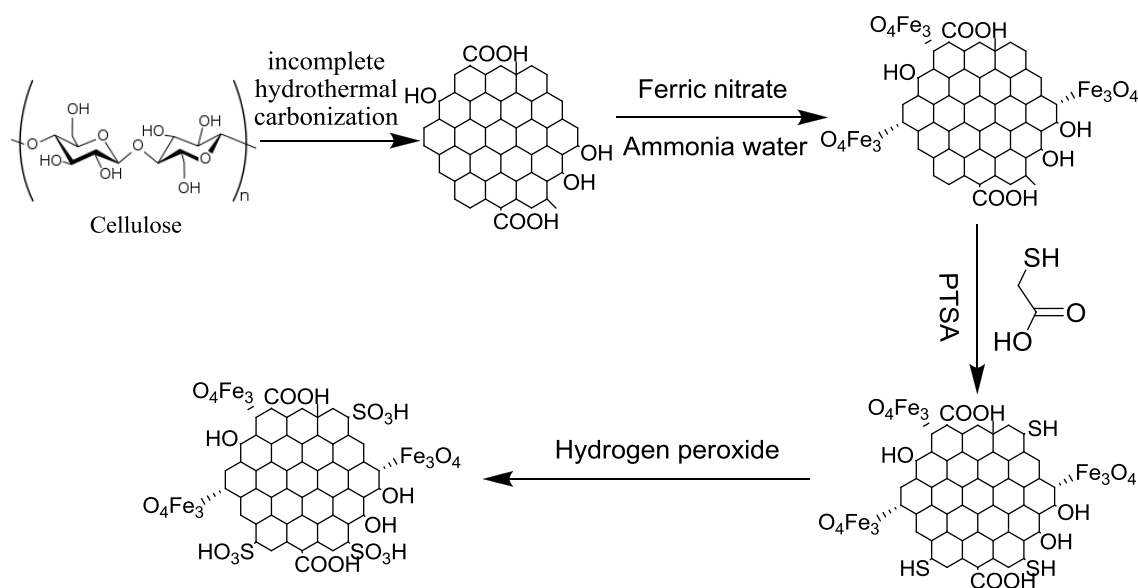

Scheme S1. Procedure for the preparation of superparamagnetic carbon material solid acid catalyst functionalized with -SO<sub>3</sub>H groups (PCM-SO<sub>3</sub>H) from cellulose.

\* Corresponding author. Email: [qixinhua@nankai.edu.cn](mailto:qixinhua@nankai.edu.cn) (X. Qi); Tel (Fax): 86-22-2350-8807.
